# Supplementary material
Source: publisher figshare collection journal article supplement (https://tandf.figshare.com/ndownloader/files/20141111)

## Timeline

|      | Jan  | February | Mar  | April | May  | June | July | August | September | October | November | December |
|------|------|----------|------|-------|------|------|------|--------|-----------|---------|----------|----------|
| 2015 | 0    | 0        | 0    | 0     | 0    | 0    | 0    | 0      | 0         | 0       | 448      | 2970     |
| 2016 | 3971 | 3888     | 4058 | 3746  | 4991 | 3651 | 3441 | 2870   | 2938      | 3162    | 3589     | 3128     |
| 2017 | 2715 | 2437     | 2682 | 2592  | 2658 | 1852 | 1364 | 1227   | 1469      | 1544    | 1895     | 596      |
| 2018 | 1058 | 1843     | 1610 | 1608  | 1554 | 1670 | 1788 | 1792   | 2762      | 2622    | 3730     | 3500     |
| 2019 | 5817 | 5411     | 4757 | 3265  | 2777 | 0    | 0    | 0      | 0         | 0       | 0        | 0        |

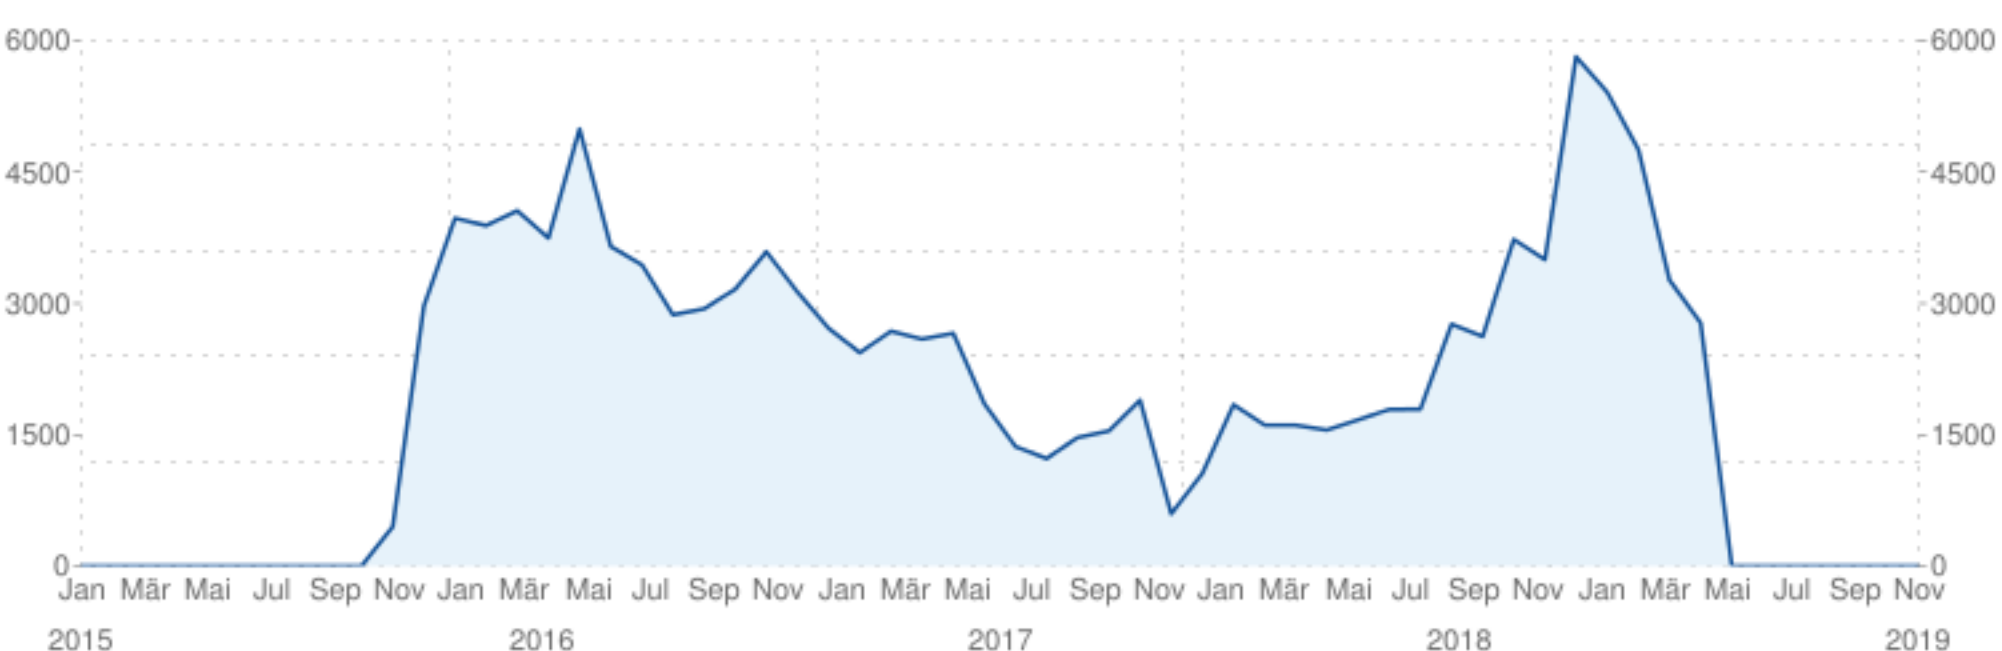

## Test progress

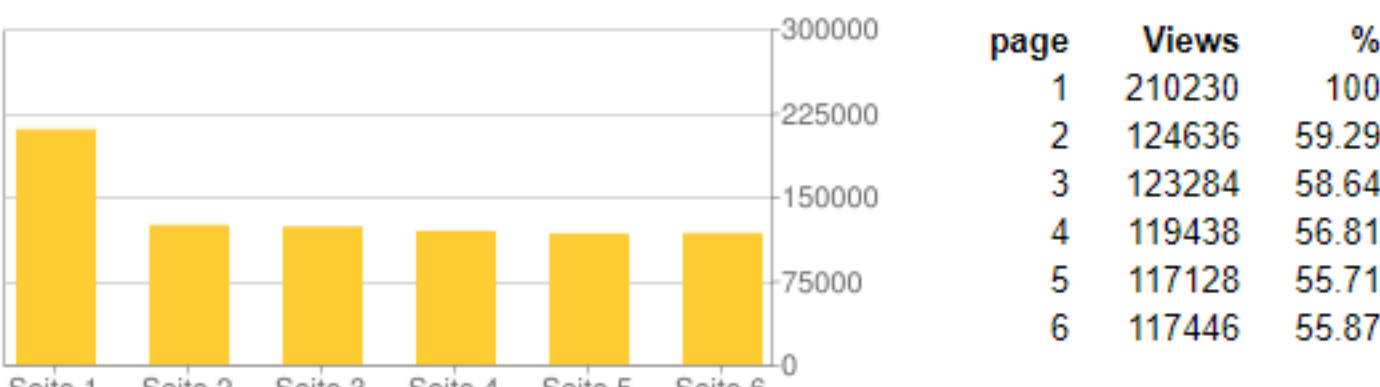

## evaluation

Period: 2015-10 - 2019-06 Mark: test Senden: 117446 of 117446 (100%)

## risk groups

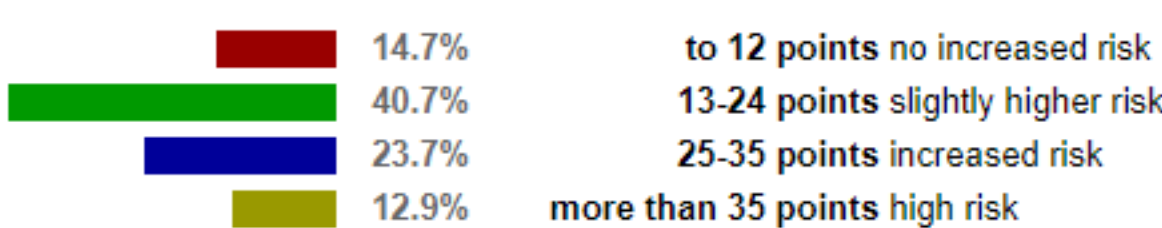

## Step 1: Characteristics

Question 1: Which gender do you have?

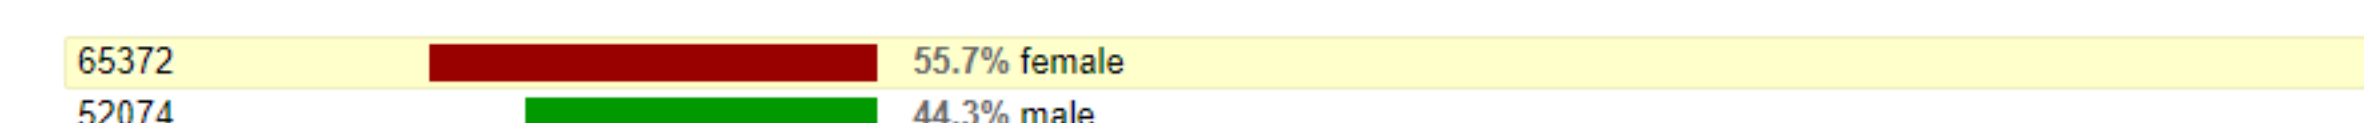

Question 2: How old are you?

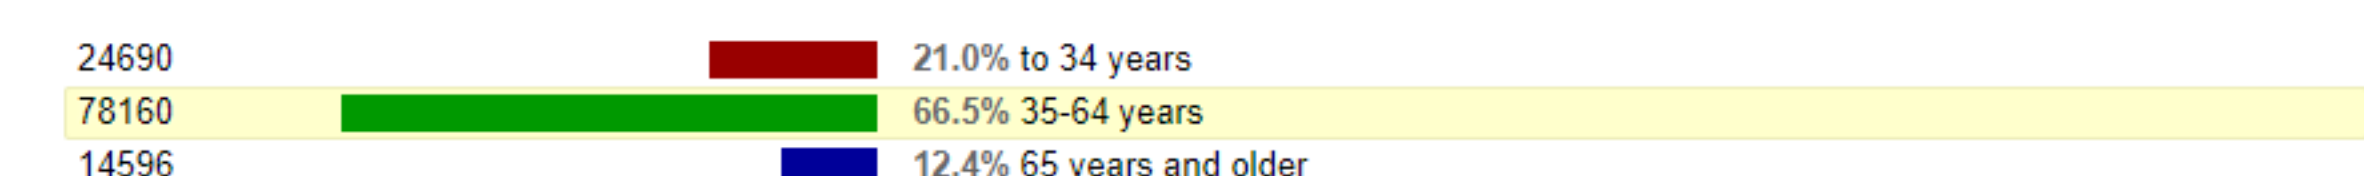

Question 3: Your body mass index?

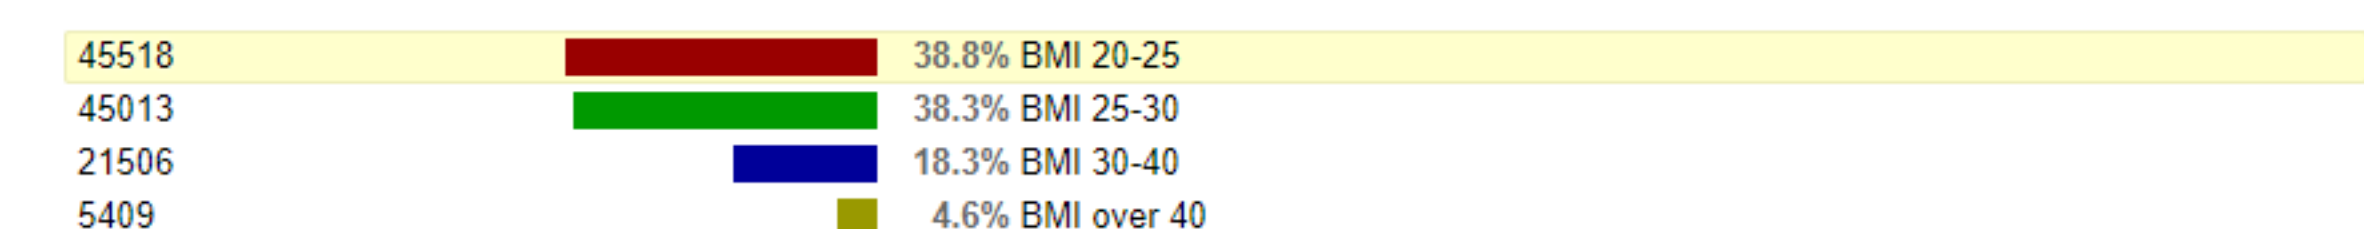

## Step 2: Healthy Life

Question 4: Do you do sports regularly?

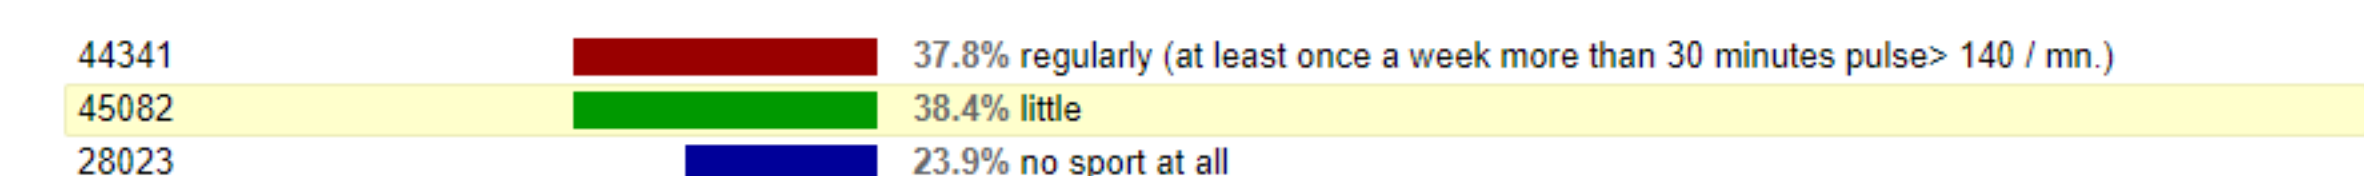

Question 5: Do you eat vegetables, salad, fruits?

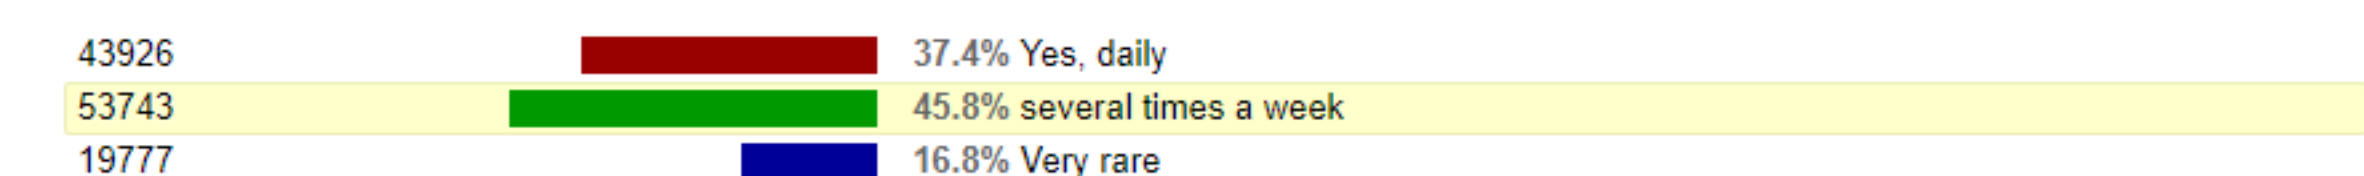

Question 6: Do you eat a lot of fatty food?

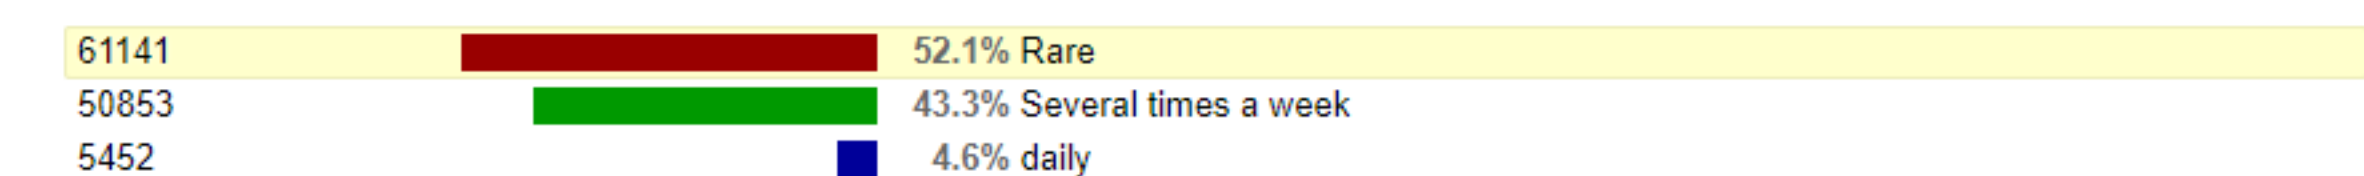

Question 7: Do you drink coffee?

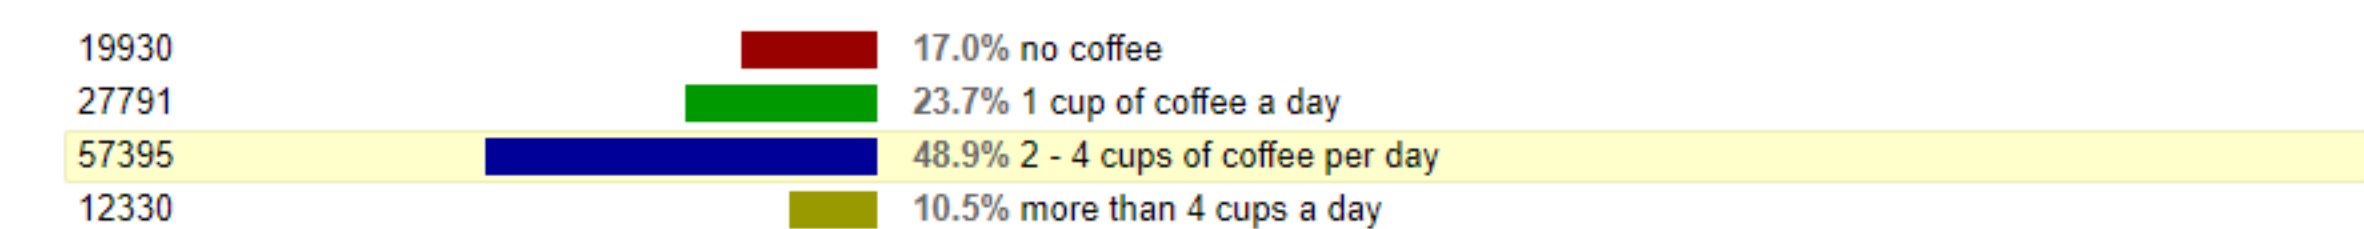

## Step 3: Toxic influences

Question 8: Are you dealing with toxic materials, solvents or gases?

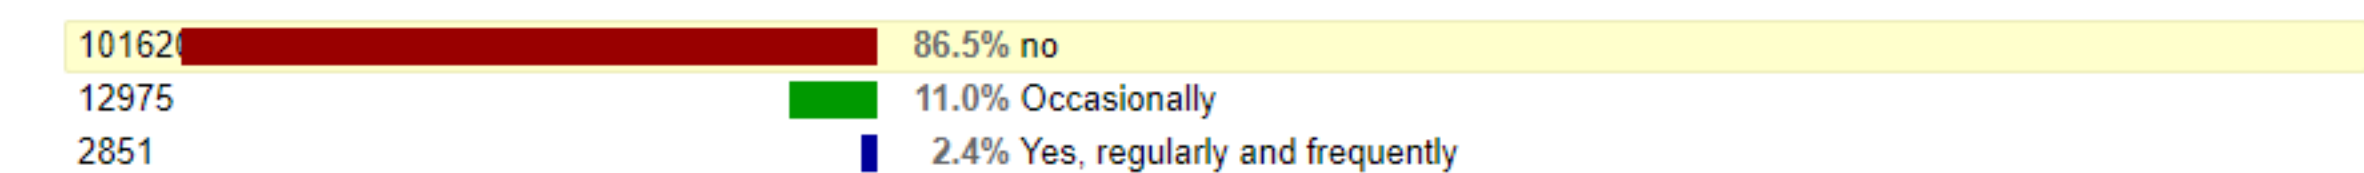

Question 9: Do you drink alcohol?

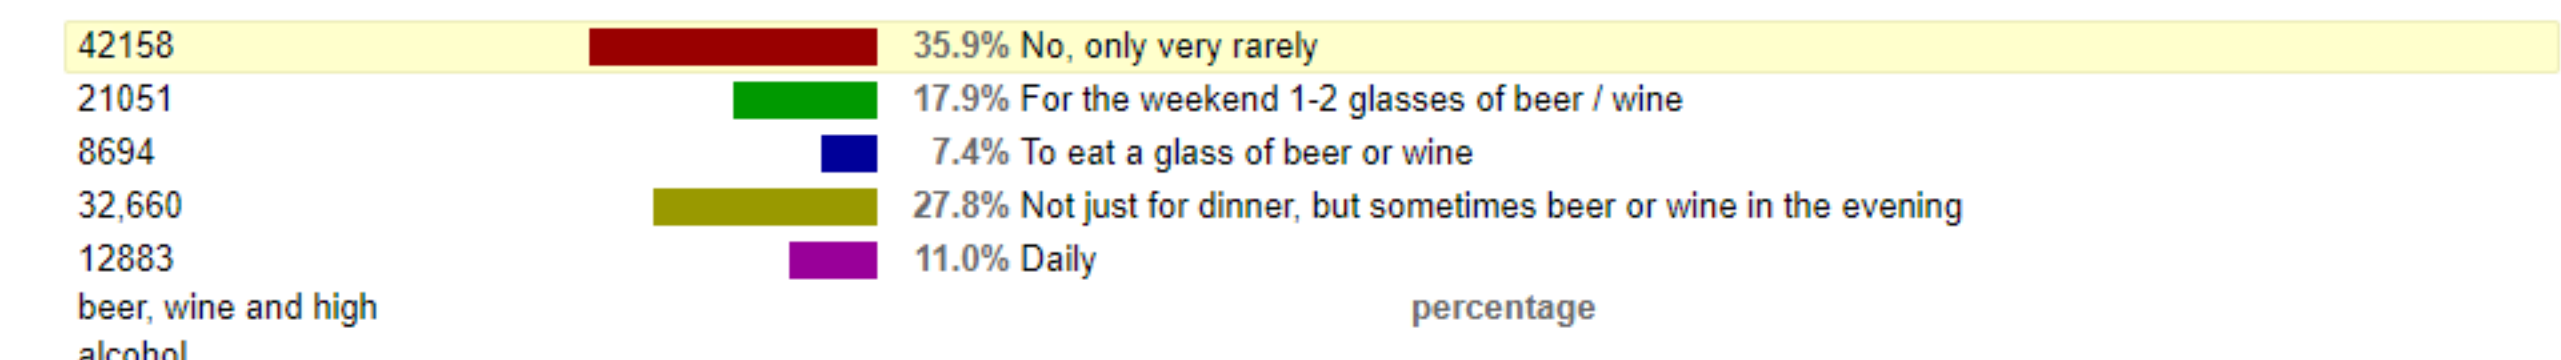

Question 10: Do you take medication?

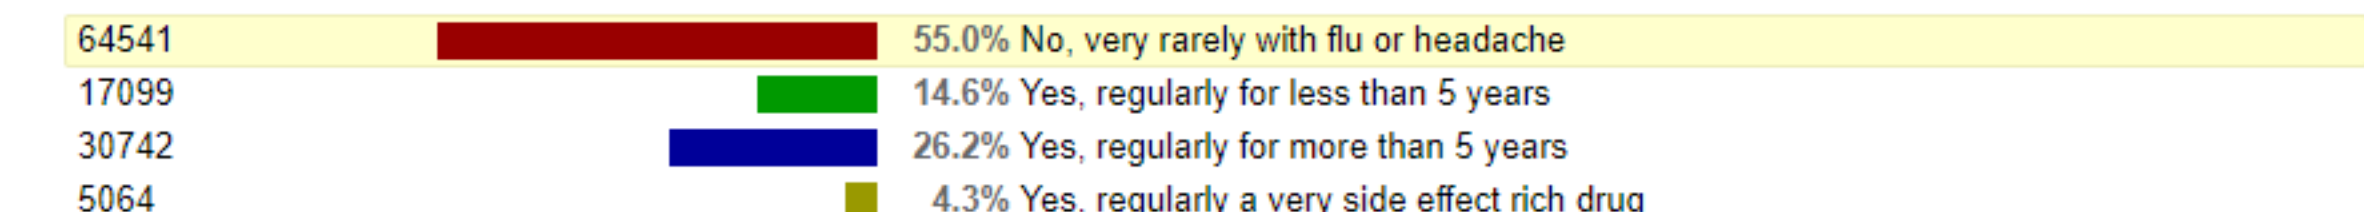

Question 11: Do you smoke?

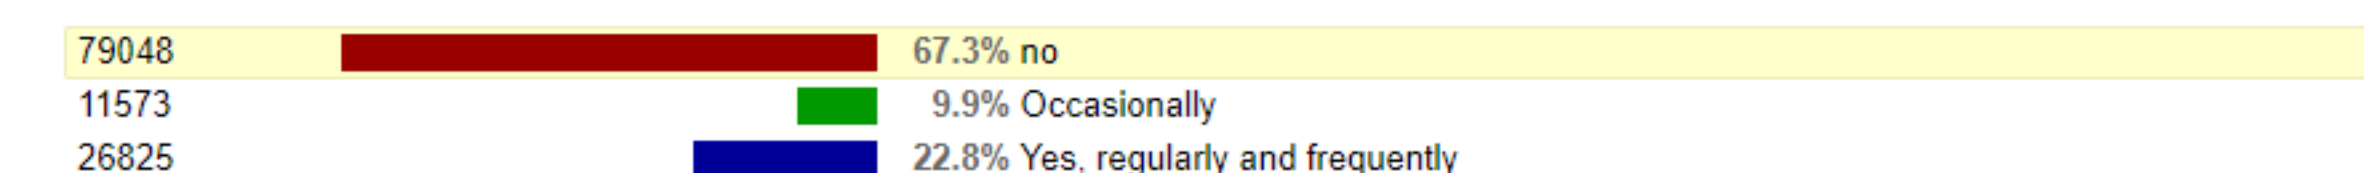

## Step 4: Risks

Question 12: Have you ever used drugs?

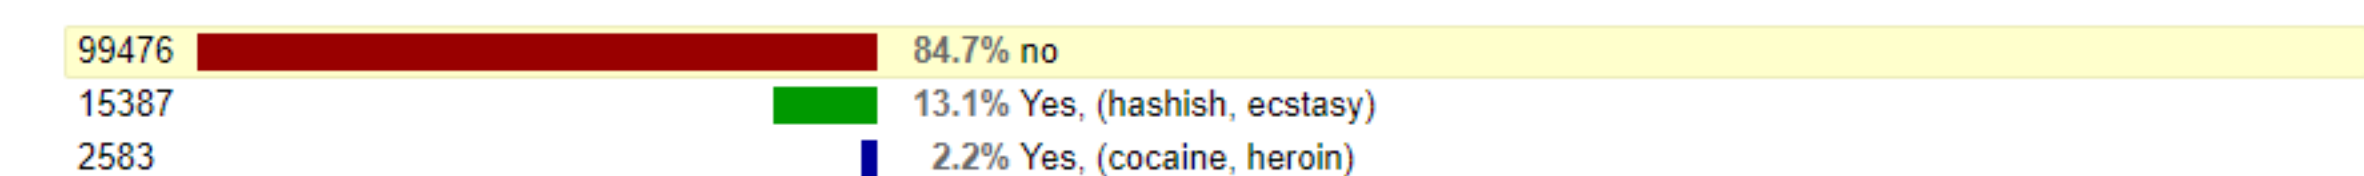

Question 13: Do you have a piercing or tattoo?

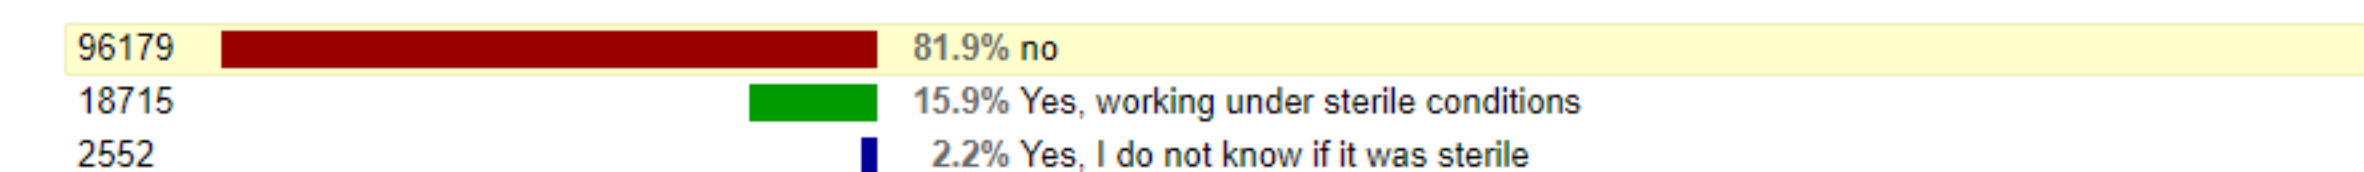

Question 14: Did you receive blood transfusions before 1992?

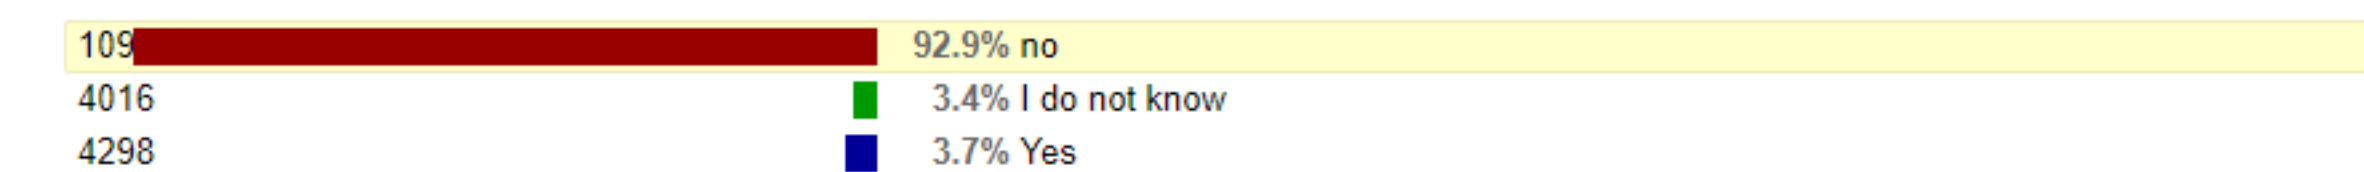

Question 15: Are you vaccinated against hepatitis A and B?

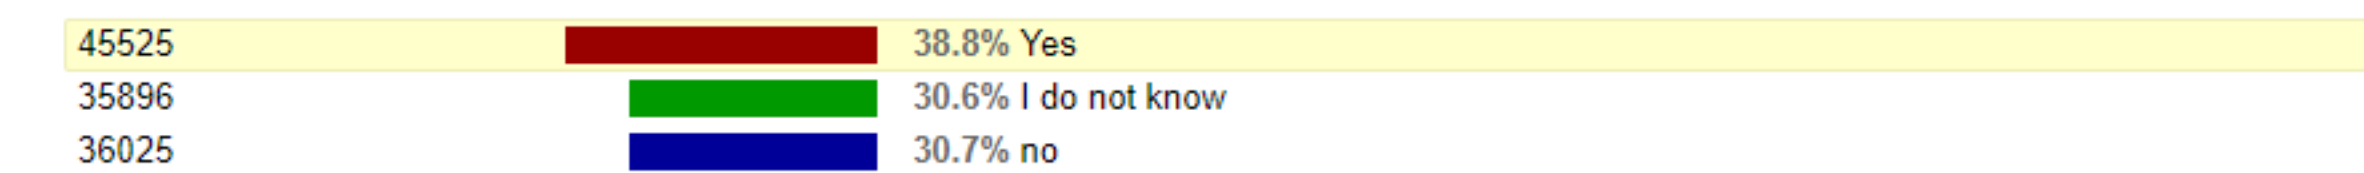

Question 16: Do you travel a lot abroad (especially Asia, Africa, Central America)?

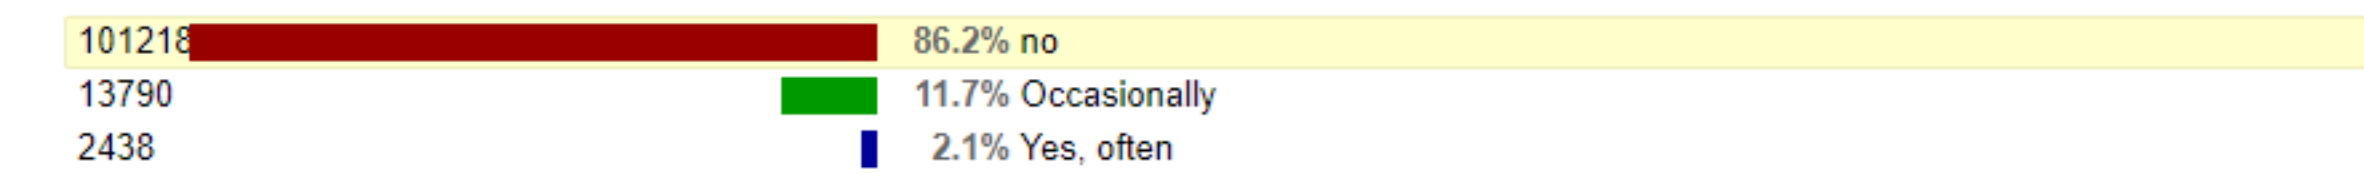

Question 17: Are you or were you exposed to infection risks?

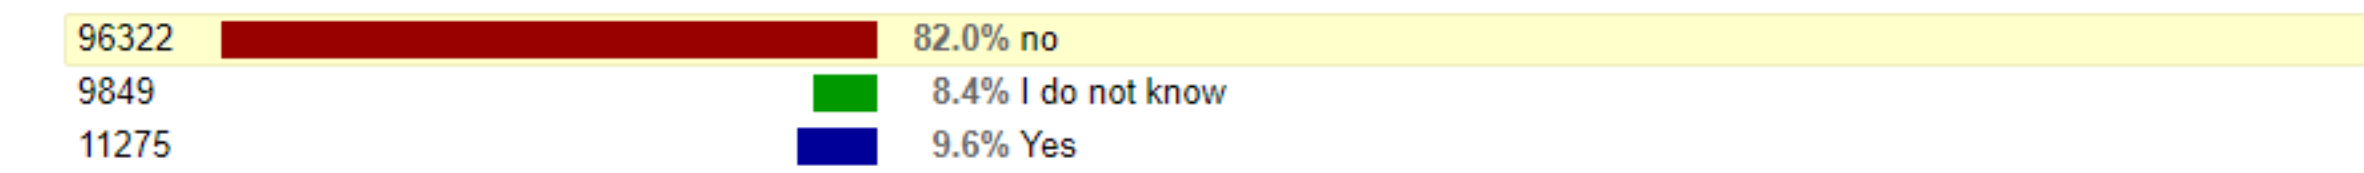

Question 18: Which of the following statements regarding sexual intercourse applies or has been made in the past?

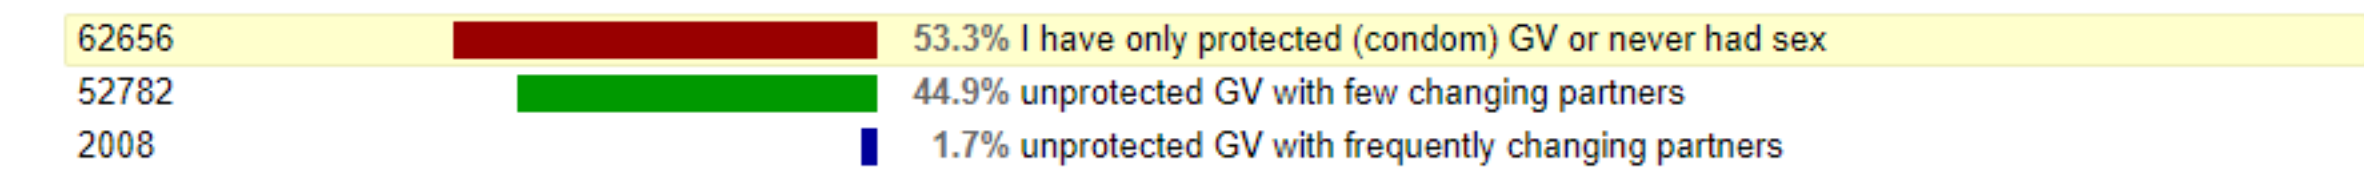

## Step 5: Symptoms

Question 19: Do you feel tired and beaten?

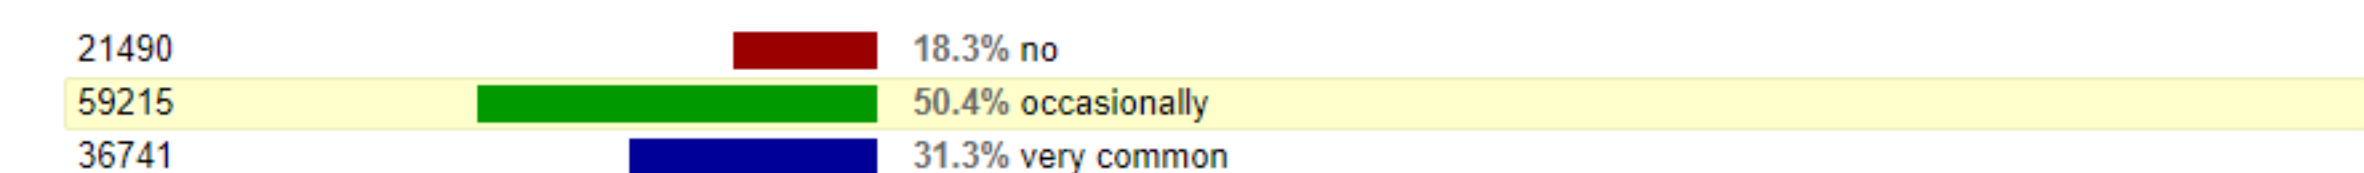

Question 20: Have you noticed a significant weight change?

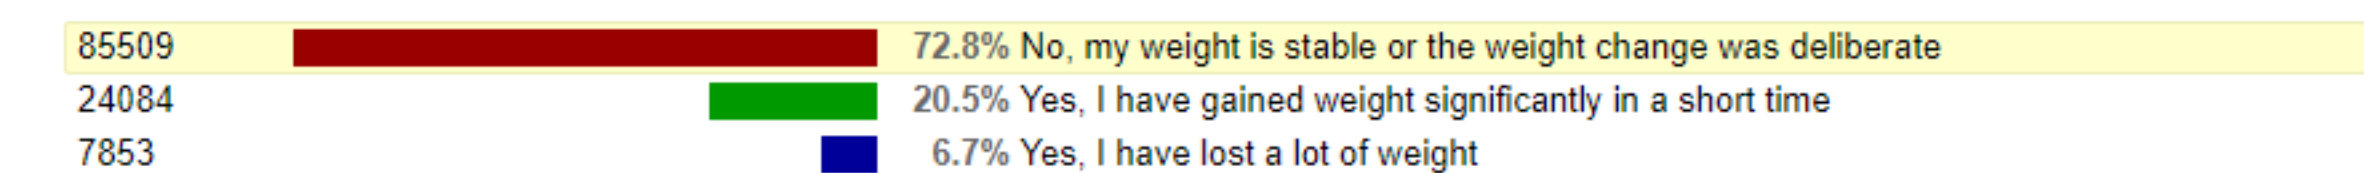

Question 21: Do you have a feeling of pressure in the right upper abdomen?

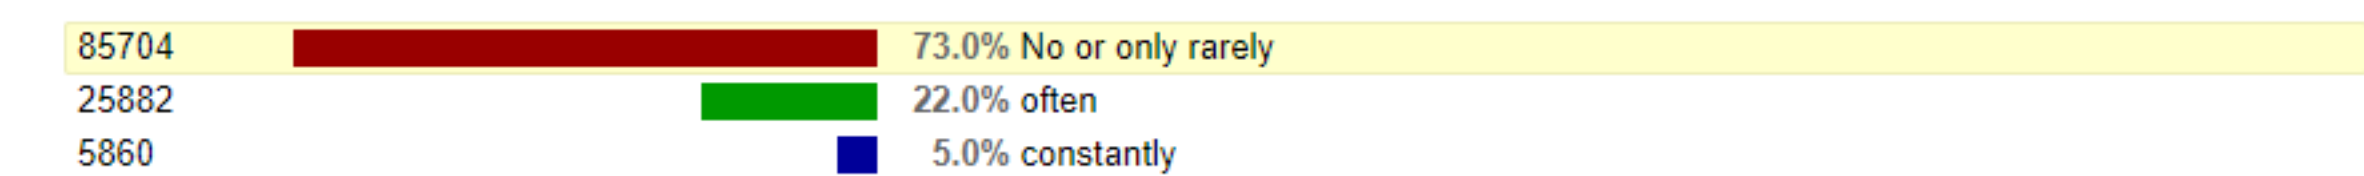

Question 22: Have you ever noticed yellowing of the eyes or skin (jaundice)?

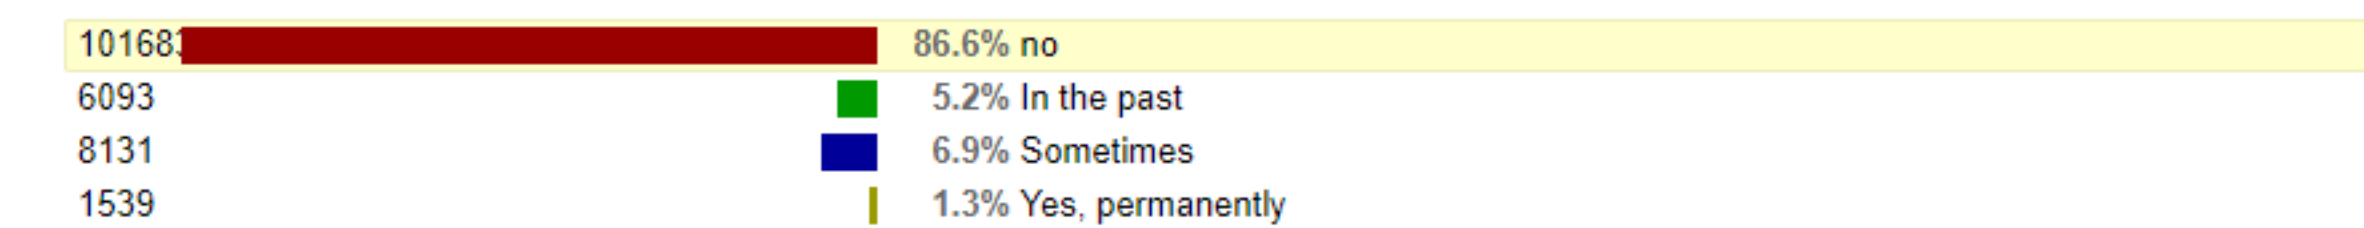

Question 23: Have you ever noticed the following symptoms:

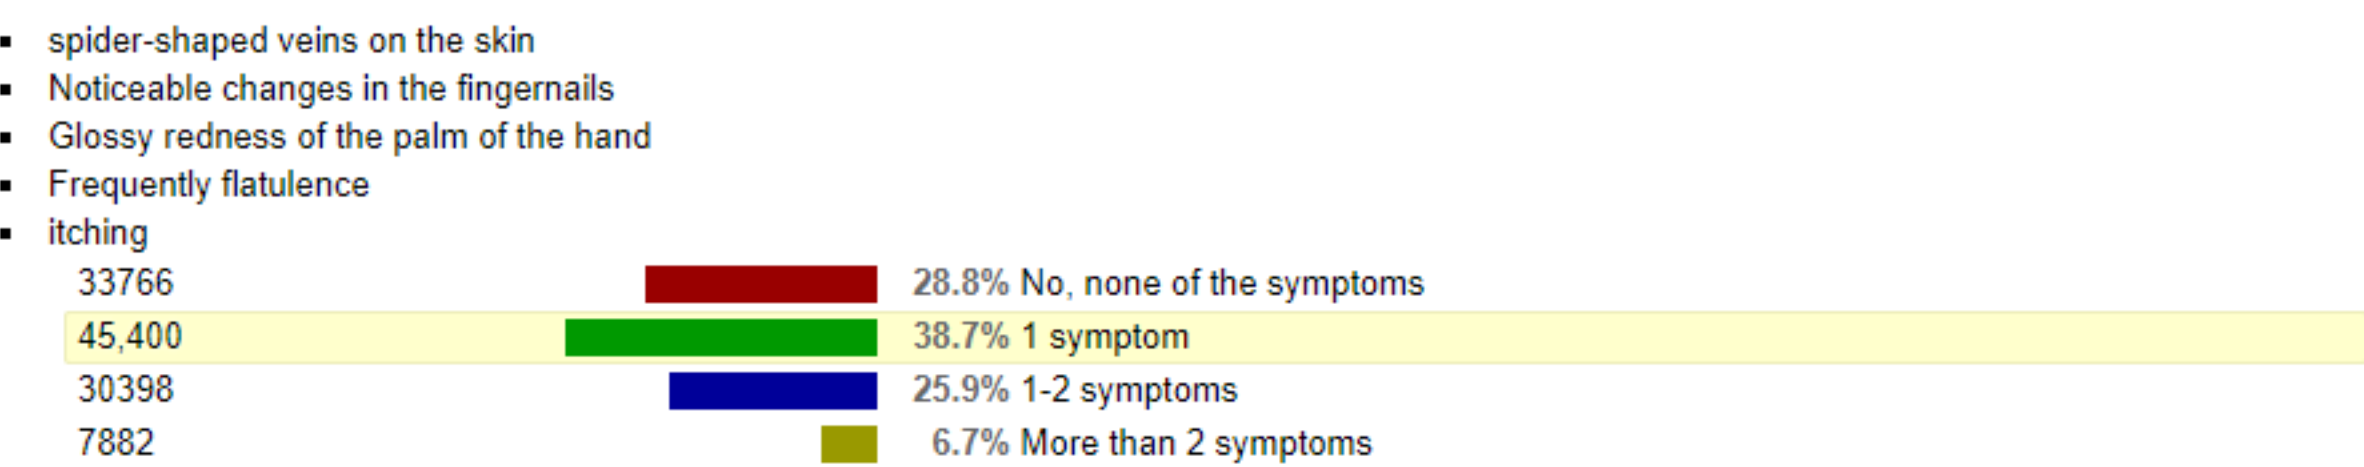

Question 24: Are your liver enzymes elevated (GOT, GPT, gamma GT)?

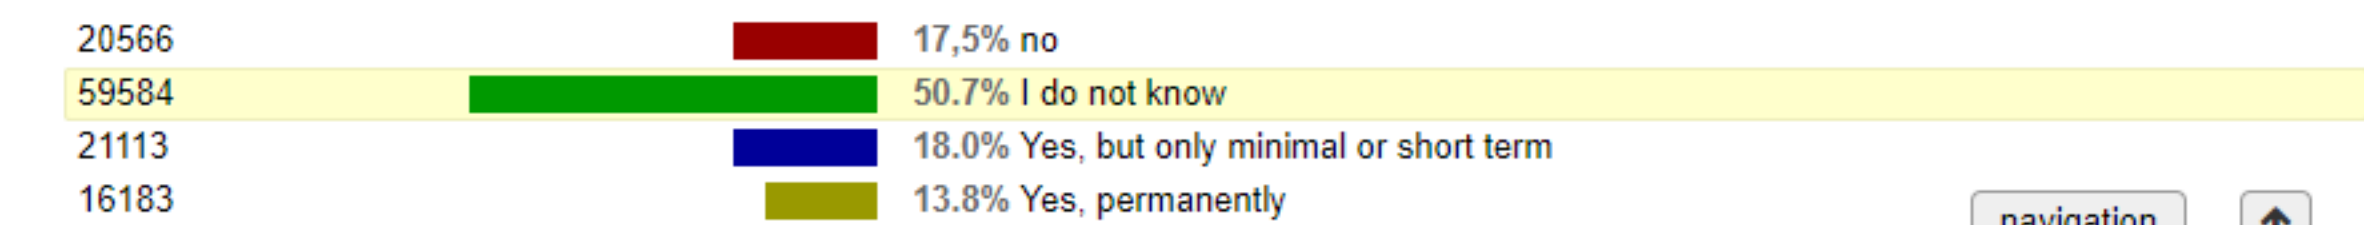

Supplement: Supplementary file 1 [file 20141111]
